# Supplementary material
Source: PubMed Central journal article supplement (PMC9759785)
Supplement: mmc1.pdf [file mmc1.pdf]

# THE LANCET

## Infectious Diseases

### Supplementary appendix 1

This translation in Bengali was submitted by the authors and we reproduce it as supplied. It has not been peer reviewed. *The Lancet's* editorial processes have only been applied to the original in English, which should serve as reference for this manuscript.

Supplement to: Ali M, Qadri F, Kim DR, et al. Effectiveness of a killed whole-cell oral cholera vaccine in Bangladesh: further follow-up of a cluster-randomised trial. *Lancet Infect Dis* 2021; published online June 16. [https://doi.org/10.1016/S1473-3099\(20\)30781-7](https://doi.org/10.1016/S1473-3099(20)30781-7).

‘এই [বাংলায়] অনুবাদটি লেখকরা জমা দিয়েছিলেন এবং এটি যেমনভাবে দেওয়া হয়েছে সেইভাবেই পুনরায় বর্ণনা করছি। এটি কোনো সমকক্ষ ব্যক্তি পর্যালোচনা করেননি। দ্য ল্যা সম্পাদকীয় প্রক্রিয়াগুলি শুধুমাত্র মূল ইংরেজিতে প্রয়োগ করা হয়েছে, যা এই পাল্লুলিপির রে হিসাবে কাজ করবে।’

**mvims¶¶c**

**cUf,wg t** wKjW¶nvj-¶mj gy¶L Lvlqv K¶jiv f¶vKwmb,wj (lwmwf) e¶vcK fv¶e Dbœeqbkxj ¶¶k K¶jiv cÖwZ¶iv¶ai Rb¶ e¶eüZ nq|  
GQvovl wKQy M¶elYvi gva¶¶g AvšR©vwZK fv¶e ¶^xK...Z n¶q¶Q ¶h lwmwf K¶jivi weiæ¶x `yB eQi Gi ¶ewk myi¶¶v w¶¶Z cv¶i|

**c¶wZ t** GB M¶elYvq, Avgiv GKwU K-v÷vi-¶ib¶WvgvBRW K¶U¶v¶j cix¶¶vq AskM¶nbKvix¶¶i g¶j U¶vqvj mgvwßi c¶i 2 eQi chš¶© d¶jvAvc K¶iwQ| g¶jZ,Avgiv evsjv¶¶ki XvKv kn¶ii ew¶¶Z 90wU ¶šMwjK K-v÷vi¶K wPwýZ K¶iwQ mgvb msL¶vq (1: 1: 1) iay lwmwf-l GKwU `yB-¶WvR ¶iwR¶gb (GK eQi ev Zvi ¶P¶q ¶ewk eqmx ¶jvK¶¶i j¶¶ K¶i), GKwU `yB-¶WvR ¶iwR¶gb lwmwfi mv¶\_ GKwU wbivc` cvwb, m¶vwb¶Ukb l nvBwRb (lqvK) e¶ve¶vcbv mn A\_ev ¶Kvbl e¶ve¶vcbv Qvov| MÖæc A¶vmvBb¶g¶U ¶Kvb gvw¶s wQj bv| lqvK e¶ve¶vcbv lwmwf¶K mvgvb¶ AwZwi³ myi¶¶v ¶¶q Ges 2 eQ¶ii d¶jv Av¶ci c¶i Zv eÜ K¶i ¶¶qv n¶qwQj| gvivZ¶K/Zxe³ K¶jivi Rb¶ mv¶f©j¶vÝ 4 eQi Ae¶vnZ wQj| lqvK e¶ve¶vcbvi ¶¶í mgqKvj Ges cÖfv¶ei Kvi¶Y Avgiv `ywU lwmwf cÖvß MÖæc ¶K GKwîZ K¶iwQ| cÖv\_wgK djvdj ,wj n'j lwmwf mvgwM¶K myi¶¶v (B¶Uvi¶fbkb K-v÷vi ,¶jvi mg¶¶ m¶¶m¶¶i myi¶¶v) Ges ,iæZi K¶jiv ¶\_¶K m¶xú~Y© myi¶¶v (B¶Uvi¶fbkb K-v÷vi¶i wUKv cÖvß e¶w³¶¶i myi¶¶v), hv Avgiv K-v÷vi-¶ib¶WvgvBRW K¶U¶v¶j cix¶¶vi Rb¶ Dchy³ gvwë¶fwi¶qej mvifvBfvj g¶Wj Øviv g¶j¶vqb K¶iwQ|  
GB U¶vqvjwU, Clinical Trials.gov G Gb wm wU 01339845¶Z wbewÜZ n¶q¶Q|

**cÖvß djvdj t** M¶elYvwU 17B GwcÖj, 2011 ¶\_¶K b¶f¶¶i 1, 2015 Gi g¶a¶ Kiv n¶qwQj| cÖ\_g ¶WvR ¶¶qvi mgq 268896 Rb AskM¶nYKvix Dcw¶Z wQj, hvi g¶a¶ B¶Uvi¶fbkb MÖæ¶c 188206 Rb Ges K¶U¶v¶j MÖæ¶c 80690 Rb wQ¶jb| lwmwf cÖvß `ywU MÖæ¶ci lwmwf Kfv¶iR wQj66% (187214 Ask MÖnYKvix¶¶i g¶a¶ 123659)| 4 eQ¶ii d¶jv-Avc PjvKvjxb mg¶q, 441wU Zxe¶ K¶jiv ¶Km mbv³ Kiv n¶qwQj (wUKv cÖvß MÖæ¶c 243 wU ¶Km Ges wUKv bv cvlqv MÖæ¶c 198 wU ¶Km)| mvgwM¶Kfv¶e lwmwf myi¶¶v wQj 36% (95% wm AvB 19 ¶\_¶K 49%) Ges ¶gvU lwmwf myi¶¶v wQj 46% (95% wm AvB 32 ¶\_¶K 58)| 5 eQi ev Zvi ¶P¶q ¶ekx eqmx hv¶¶i (49%; 35 ¶\_¶K 60) wUKv ¶¶qv n¶q¶Q, Ggb Ask M¶nYKvixi ¶P¶q 5 eQi (24%; 30 ¶\_¶K 56) eq¶mi Av¶M wUKv cÖvß Ask M¶nYKvixi Rb¶ ¶gvU wUKv myi¶¶v D¶j¶L¶hvM¶ fv¶e Kg wQj| hw¶ l `ywU eq¶mi Rb¶Mvöxi wUKv myi¶¶vi cv\_©K¶ D¶j¶L¶hvM¶ wQj bv ( wc = 0.3308)| 1-4 eQi eq¶mi wki¶¶i g¶a¶ wUKv cÖvß¶i wZb eQi c¶i ¶gvU wUKv myi¶¶v D¶j¶L¶hvM¶ fv¶e ( wc = 0.0115) n¶vm ¶ct¶q¶Q|

**e¶vL¶v t** GB djvdj ,¶jv wKjW ¶nvj¶mj lwmwfi `xN© ¶gqv`x Kvh©KvwiZvi Avi l cÖgvY mieivn K¶i, GQvovl G¶ÚwgK K¶jivi wbqšž¶Y ¶nvj¶mj lwmwf e¶env¶ii c¶¶ Avil mg\_©b ¶¶q| Z¶e GB M¶elYv GUvl Bw¶Z ¶¶q ¶h hv¶¶i 5 eQ¶i ev Gi Dc¶ii eq¶m wUKv ¶¶qv n¶q¶Q Zv¶¶i Zyjbvq ¶h me wki¶¶i 5 eQ¶ii Av¶M lwmwf UxKv ¶¶qv n¶q¶Q Zv¶¶i wUKv myi¶¶v ¶¶í mg¶qi Rb¶ ¶¶q|
