# Supplementary material
Source: PubMed Central journal article supplement (PMC9759785)
Supplement: mmc2.pdf [file mmc2.pdf]

# THE LANCET

## Infectious Diseases

### Supplementary appendix 2

This appendix formed part of the original submission and has been peer reviewed.  
We post it as supplied by the authors.

Supplement to: Ali M, Qadri F, Kim DR, et al. Effectiveness of a killed whole-cell oral cholera vaccine in Bangladesh: further follow-up of a cluster-randomised trial. *Lancet Infect Dis* 2021; published online June 16. [https://doi.org/10.1016/S1473-3099\(20\)30781-7](https://doi.org/10.1016/S1473-3099(20)30781-7).

## Appendix

Figure A1. CONSORT for assembling the population for evaluating total vaccine effectiveness

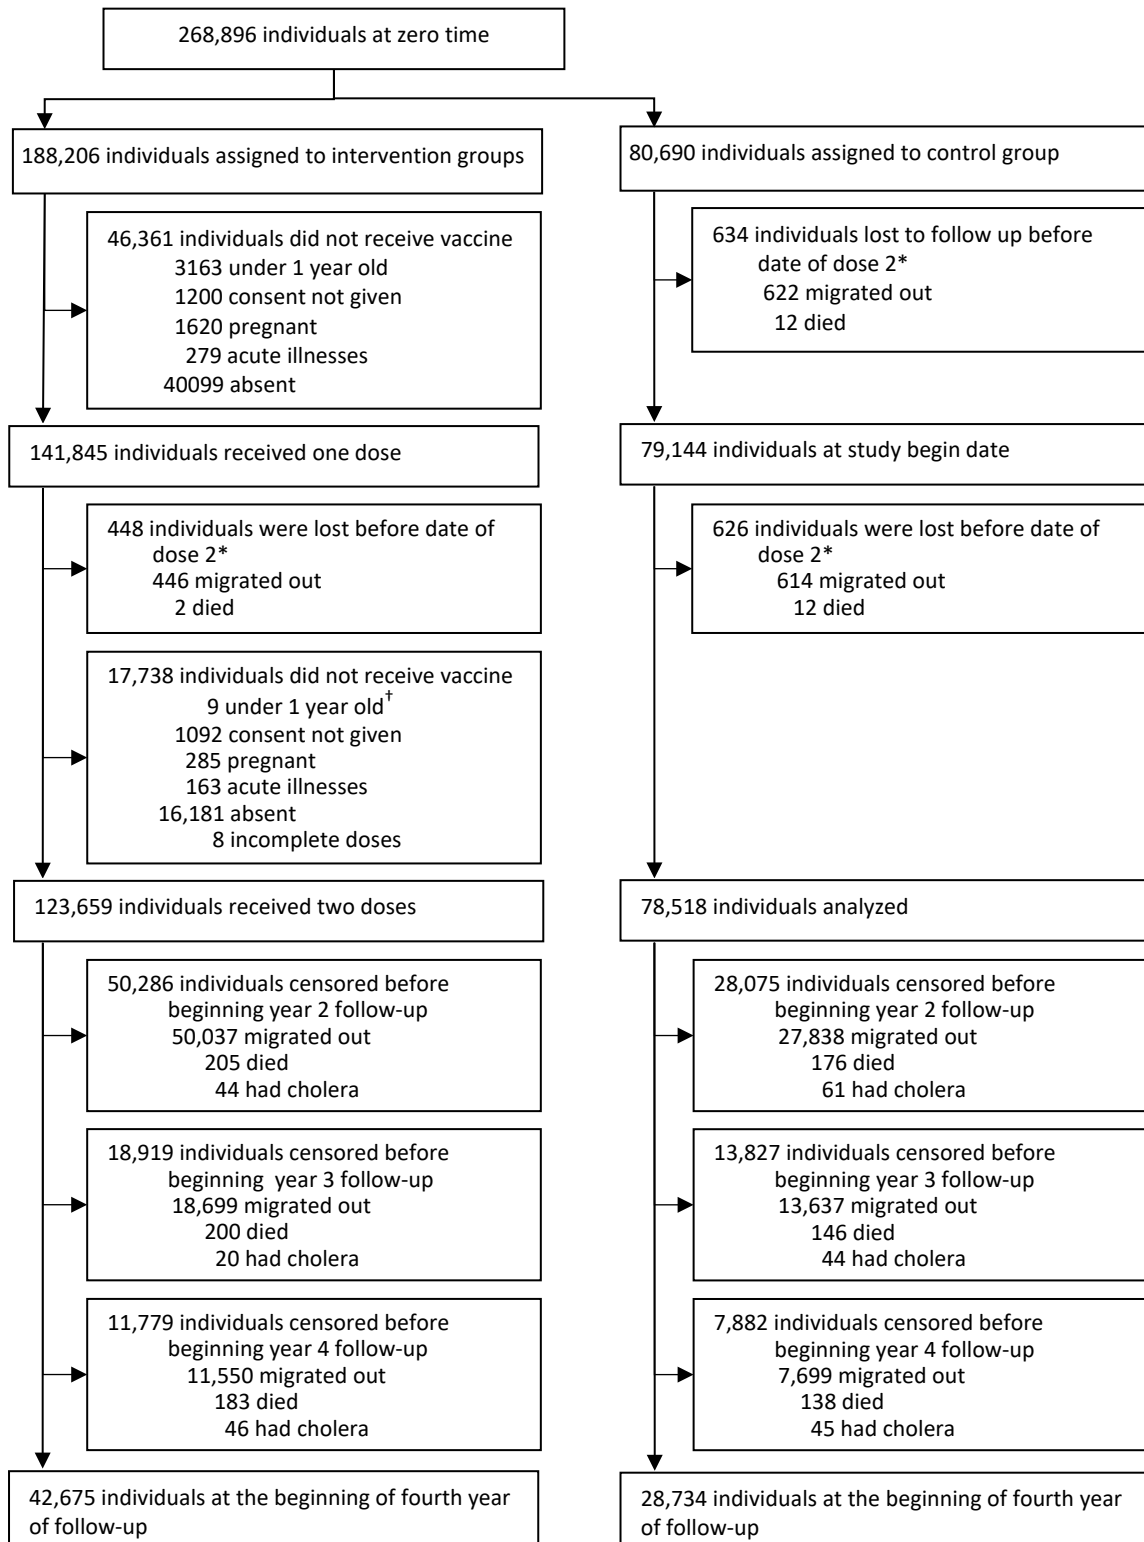

\* The date of dose 2 for the two-dose recipients, or the median date of dose 2 of the cycle of vaccination for no- or one-dose recipients.

† Assessed by the vaccinators during the time of vaccination

Figure A2. Kaplan-Meier estimates of the cumulative risk of not having severe dehydrated cholera among target population at zero time during 4 years of follow-up post-vaccination (total vaccine effectiveness analysis)

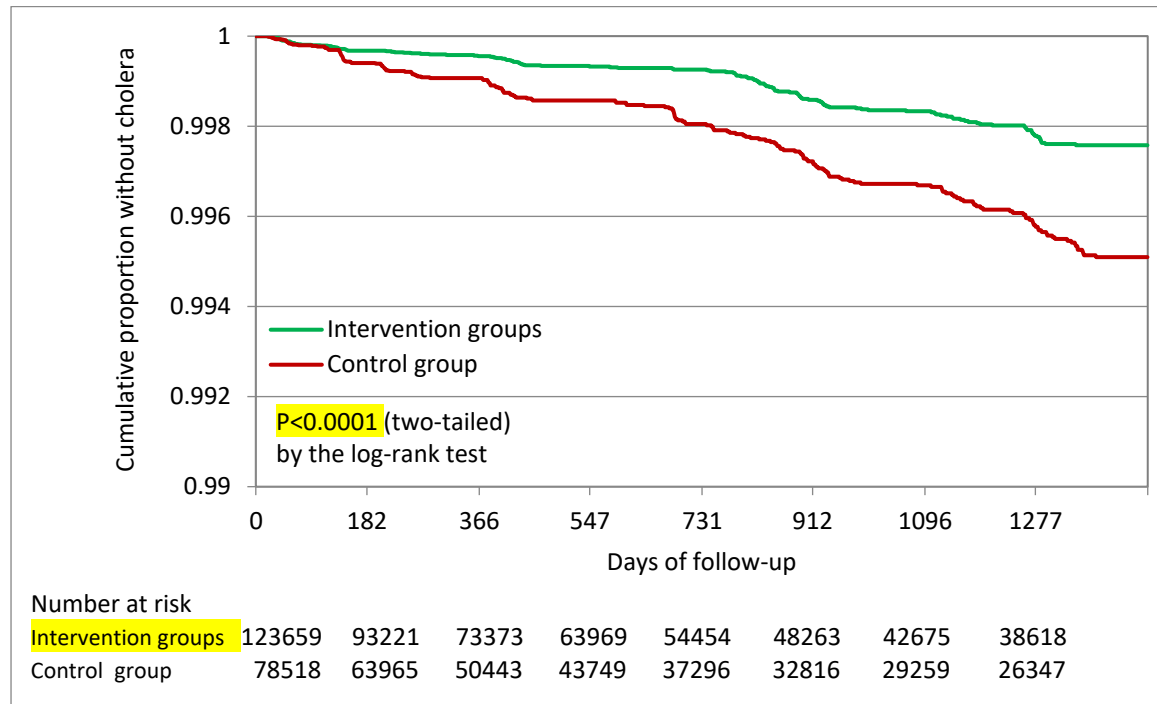

Table A1. Baseline characteristics for analysis of overall vaccine protection at the onset of the first year of follow-up

| Variables                                                                                   | Vaccine group<br>(n=187,214) | Control<br>group<br>(n=80,056) |
|---------------------------------------------------------------------------------------------|------------------------------|--------------------------------|
| Mean age at zero time (SD; years)                                                           | 23.9 (15.7)                  | 24.1 (16.0)                    |
| Male participants (%)                                                                       | 90,841 (48.5)*               | 39,264 (49.0)                  |
| Diarrhoea within previous 6 months at the time of household registration (%)                | 24,800 (13.2)                | 11,189 (14.0)                  |
| Diarrhoea within previous 48 hours at the time of household registration (%)                | 2,352 (1.3)                  | 1,003 (1.3)                    |
| Mean time living in the area (SD; months)                                                   | 65.8 (113.8)                 | 74.1 (121.7)                   |
| Lived in study area less than 1 year (%)                                                    | 85,278 (45.6)                | 32,424 (40.5)                  |
| Live in their own house (%)                                                                 | 38,837 (20.7)                | 20,075 (25.1)                  |
| Households using safe water source (household tap, %)                                       | 9,576 (5.1)                  | 4,228 (5.3)                    |
| Live in a household with specific place for waste disposal (%)                              | 153,780 (82.1)               | 61,943 (77.4)                  |
| Live in a household with using sanitary (flushing) toilet (%)                               | 139,759 (74.7)               | 62,149 (77.6)                  |
| Live in a household with a concrete roof (%)                                                | 161,502 (86.3)               | 67,532 (84.4)                  |
| Live in a household with only one room (%)                                                  | 152,695 (81.6)               | 64,679 (80.8)                  |
| Sharing kitchen with other households (%)                                                   | 165,693 (88.5)               | 66,536 (83.1)                  |
| Live in a household sharing water source with others (%)                                    | 126,892 (67.8)               | 48,563 (60.7)                  |
| Live in a household using treated water (boiled, filtered, or chemical treatment, %)        | 102,037 (54.5)               | 42,276 (52.8)                  |
| Live in a household that knows about cholera vaccine (%)                                    | 13,839 (7.4)                 | 6,432 (8.0)                    |
| Live in household close (less than the median distance) to the nearest icddr,b hospital (%) | 89,954 (48.0)                | 39,377 (49.2)                  |
| Mean number of individuals per household (SD)                                               | 4.7 (1.9)                    | 4.8 (1.9)                      |
| Median distance to the nearest icddr,b hospitals (IQR; meters)                              | 1792 (1229, 2282)            | 1802 (994, 2414)               |

| Variables                                                                                  | Vaccine group<br>(n=187,214) | Control<br>group<br>(n=80,056) |
|--------------------------------------------------------------------------------------------|------------------------------|--------------------------------|
| Mean percentage of children younger than 5 years in the cluster (SD)                       | 10.0% (1.0)                  | 10.1% (1.0)                    |
| Mean percentage of male participants in the cluster (SD)                                   | 48.5% (1.3)*                 | 49.0% (0.9)                    |
| Mean percentage of individuals using safe water source in the cluster (SD)                 | 5.1% (4.6)                   | 5.3% (3.6)                     |
| Mean percentage of individuals living in their own house in the cluster (SD)               | 20.7% (17.9)                 | 25.0% (24.7)                   |
| Mean percentage of individuals using specific place for waste disposal in the cluster (SD) | 82.1% (23.4)                 | 77.4% (24.2)                   |
| Mean percentage of individuals using sanitary (flushing) toilet in the cluster (SD)        | 74.6% (23.4)                 | 77.6% (21.5)                   |

Note, the level of significance was derived after adjustment for the design effect.

\*The difference is statistically significant ( $p < 0.05$ ) compared to the control group.

Table A2. Baseline characteristics for analysis of overall vaccine protection at the onset of the second year of follow-up

| Variables                                                                                   | Vaccine group<br>(n=104,799) | Control<br>group<br>(n=51,420) |
|---------------------------------------------------------------------------------------------|------------------------------|--------------------------------|
| Mean age at zero time (SD; years)                                                           | 24.7 (16.4)                  | 24.6 (16.5)                    |
| Male participants (%)                                                                       | 51,828 (49.5)                | 25,511 (49.6)                  |
| Diarrhoea within previous 6 months at the time of household registration (%)                | 14,000 (13.4)                | 7,129 (13.9)                   |
| Diarrhoea within previous 48 hours at the time of household registration (%)                | 1,248 (1.2)                  | 608 (1.2)                      |
| Mean time living in the area (SD; months)                                                   | 93.1 (131.6)                 | 96.2 (135.8)                   |
| Lived in study area less than 1 year (%)                                                    | 34,901 (33.3)                | 16,049 (31.2)                  |
| Live in their own house (%)                                                                 | 32,866 (31.4)                | 17,715 (34.5)                  |
| Households using safe water source (household tap, %)                                       | 6,945 (6.6)                  | 3,394 (6.6)                    |
| Live in a household with specific place for waste disposal (%)                              | 85,844 (81.9)                | 39,346 (76.5)                  |
| Live in a household with using sanitary (flushing) toilet (%)                               | 78,014 (74.4)                | 40,118 (78.0)                  |
| Live in a household with a concrete roof (%)                                                | 90,087 (86.0)                | 43,209 (84.0)                  |
| Live in a household with only one room (%)                                                  | 79,492 (75.9)                | 39,176 (76.2)                  |
| Sharing kitchen with other households (%)                                                   | 88,659 (84.6)                | 40,547 (78.9)                  |
| Live in a household sharing water source with others (%)                                    | 66,913 (63.8)                | 29,420 (57.2)                  |
| Live in a household using treated water (boiled, filtered, or chemical treatment, %)        | 57,483 (54.9)                | 26,661 (51.8)                  |
| Live in a household that knows about cholera vaccine (%)                                    | 8,277 (7.9)                  | 4,393 (8.5)                    |
| Live in household close (less than the median distance) to the nearest icddr,b hospital (%) | 51,200 (48.9)                | 25,011 (48.6)                  |
| Mean number of individuals per household (SD)                                               | 4.9 (2.0)                    | 4.9 (2.0)                      |
| Median distance to the nearest icddr,b hospitals (IQR; meters)                              | 1778 (1274, 2256)            | 1812 (1221, 2403)              |

| Variables                                                                                  | Vaccine group<br>(n=104,799) | Control<br>group<br>(n=51,420) |
|--------------------------------------------------------------------------------------------|------------------------------|--------------------------------|
| Mean percentage of children younger than 5 years in the cluster (SD)                       | 10.0% (1.0)                  | 10.1% (1.0)                    |
| Mean percentage of male participants in the cluster (SD)                                   | 48.6% (1.2)*                 | 49.1% (0.9)                    |
| Mean percentage of individuals using safe water source in the cluster (SD)                 | 5.5% (4.8)                   | 5.5% (3.6)                     |
| Mean percentage of individuals living in their own house in the cluster (SD)               | 22.7% (19.4)                 | 28.1% (26.5)                   |
| Mean percentage of individuals using specific place for waste disposal in the cluster (SD) | 82.0% (23.7)                 | 76.6% (24.3)                   |
| Mean percentage of individuals using sanitary (flushing) toilet in the cluster (SD)        | 74.6% (23.5)                 | 77.5% (21.6)                   |

Note, the level of significance was derived after adjustment for the design effect.

\*The difference is statistically significant ( $p < 0.05$ ) compared to the control group.

Table A3. Baseline characteristics for analysis of overall vaccine protection at the onset of the third year of follow-up

| Variables                                                                                   | Vaccine group<br>(n=75,584) | Control<br>group<br>(n=37,296) |
|---------------------------------------------------------------------------------------------|-----------------------------|--------------------------------|
| Mean age at zero time (SD; years)                                                           | 25.1 (16.7)                 | 25.1 (16.8)                    |
| Male participants (%)                                                                       | 37,797 (50.0)               | 18,702 (50.1)                  |
| Diarrhoea within previous 6 months at the time of household registration (%)                | 10,075 (13.3)               | 5,174 (13.9)                   |
| Diarrhoea within previous 48 hours at the time of household registration (%)                | 897 (1.2)                   | 415 (1.1)                      |
| Mean time living in the area (SD; months)                                                   | 110.1 (140.5)               | 114.7 (145.0)                  |
| Lived in study area less than 1 year (%)                                                    | 21,339 (28.2)               | 9,619 (25.8)                   |
| Live in their own house (%)                                                                 | 28,852 (38.2)               | 15,848 (42.5)                  |
| Households using safe water source (household tap, %)                                       | 5,671 (7.5)                 | 2,765 (7.4)                    |
| Live in a household with specific place for waste disposal (%)                              | 61,733 (81.7)               | 28,144 (75.5)                  |
| Live in a household with using sanitary (flushing) toilet (%)                               | 55,802 (73.8)               | 28,636 (76.8)                  |
| Live in a household with a concrete roof (%)                                                | 64,933 (85.9)               | 31,460 (84.4)                  |
| Live in a household with only one room (%)                                                  | 55,002 (72.8)               | 27,267 (73.1)                  |
| Sharing kitchen with other households (%)                                                   | 61,954 (82.0)               | 28,068 (75.3)                  |
| Live in a household sharing water source with others (%)                                    | 45,829 (60.6)               | 19,880 (53.3)                  |
| Live in a household using treated water (boiled, filtered, or chemical treatment, %)        | 40,883 (54.1)               | 18,545 (49.7)                  |
| Live in a household that knows about cholera vaccine (%)                                    | 5,645 (7.5)                 | 2,933 (7.9)                    |
| Live in household close (less than the median distance) to the nearest icddr,b hospital (%) | 35,960 (47.6)               | 17,408 (46.7)                  |
| Mean number of individuals per household (SD)                                               | 5.0 (2.0)                   | 5.0 (2.0)                      |
| Median distance to the nearest icddr,b hospitals (IQR; meters)                              | 1804 (1352, 2262)           | 1837 (1359, 2424)              |



| Variables                                                                                  | Vaccine group<br>(n=75,584) | Control<br>group<br>(n=37,296) |
|--------------------------------------------------------------------------------------------|-----------------------------|--------------------------------|
| Mean percentage of children younger than 5 years in the cluster (SD)                       | 10.0% (1.0)                 | 10.1% (1.0)                    |
| Mean percentage of male participants in the cluster (SD)                                   | 48.6% (1.2)*                | 49.1% (0.9)                    |
| Mean percentage of individuals using safe water source in the cluster (SD)                 | 5.7% (5.0)                  | 5.6% (3.7)                     |
| Mean percentage of individuals living in their own house in the cluster (SD)               | 24.1% (20.1)                | 31.2% (27.5)                   |
| Mean percentage of individuals using specific place for waste disposal in the cluster (SD) | 81.8% (23.8)                | 75.9% (24.5)                   |
| Mean percentage of individuals using sanitary (flushing) toilet in the cluster (SD)        | 74.4% (23.8)                | 76.7% (22.5)                   |

Note, the level of significance was derived after adjustment for the design effect.

\*The difference is statistically significant ( $p < 0.05$ ) compared to the control group.

Table A4. Baseline characteristics for analysis of overall vaccine protection at the onset of the fourth year of follow-up

| Variables                                                                                   | Vaccine group<br>(n=58,315) | Control<br>group<br>(n=29,259) |
|---------------------------------------------------------------------------------------------|-----------------------------|--------------------------------|
| Mean age at zero time (SD; years)                                                           | 25.4 (17.0)                 | 25.3 (17.0)                    |
| Male participants (%)                                                                       | 29,384 (50.4)               | 14,817 (50.6)                  |
| Diarrhoea within previous 6 months at the time of household registration (%)                | 7,830 (13.4)                | 4,017 (13.7)                   |
| Diarrhoea within previous 48 hours at the time of household registration (%)                | 672 (1.2)                   | 306 (1.0)                      |
| Mean time living in the area (SD; months)                                                   | 123.1 (145.9)               | 128.7 (150.5)                  |
| Lived in study area less than 1 year (%)                                                    | 14,636 (25.1)               | 6,499 (22.2)                   |
| Live in their own house (%)                                                                 | 25,592 (43.9)               | 14,250 (48.7)                  |
| Households using safe water source (household tap, %)                                       | 4,832 (8.3)                 | 2,299 (7.9)                    |
| Live in a household with specific place for waste disposal (%)                              | 47,444 (81.4)               | 21,859 (74.7)                  |
| Live in a household with using sanitary (flushing) toilet (%)                               | 42,909 (73.6)               | 22,253 (76.1)                  |
| Live in a household with a concrete roof (%)                                                | 50,171 (86.0)               | 24,896 (85.1)                  |
| Live in a household with only one room (%)                                                  | 41,103 (70.5)               | 20,796 (71.1)                  |
| Sharing kitchen with other households (%)                                                   | 46,444 (79.6)               | 21,172 (72.4)                  |
| Live in a household sharing water source with others (%)                                    | 33,781 (57.9)               | 14,763 (50.5)                  |
| Live in a household using treated water (boiled, filtered, or chemical treatment, %)        | 30,949 (53.1)               | 13,860 (47.4)                  |
| Live in a household that knows about cholera vaccine (%)                                    | 4,109 (7.0)                 | 2,173 (7.4)                    |
| Live in household close (less than the median distance) to the nearest icddr,b hospital (%) | 27,309 (46.8)               | 13,605 (46.5)                  |
| Mean number of individuals per household (SD)                                               | 5.1 (2.0)                   | 5.1 (2.0)                      |
| Median distance to the nearest icddr,b hospitals (IQR; meters)                              | 1831 (1402, 2270)           | 1838 (1373, 2448)              |
| Mean percentage of children younger than 5 years in the cluster (SD)                        | 10.0% (1.0)                 | 10.1% (1.0)                    |

| Variables                                                                                  | Vaccine group<br>(n=58,315) | Control<br>group<br>(n=29,259) |
|--------------------------------------------------------------------------------------------|-----------------------------|--------------------------------|
| Mean percentage of male participants in the cluster (SD)                                   | 48.7% (1.2)*                | 49.2% (0.9)                    |
| Mean percentage of individuals using safe water source in the cluster (SD)                 | 5.9% (5.1)                  | 5.7% (3.7)                     |
| Mean percentage of individuals living in their own house in the cluster (SD)               | 25.5% (20.6)                | 33.6% (28.2)                   |
| Mean percentage of individuals using specific place for waste disposal in the cluster (SD) | 81.6% (24.0)                | 75.4% (24.6)                   |
| Mean percentage of individuals using sanitary (flushing) toilet in the cluster (SD)        | 74.5% (23.9)                | 76.3% (22.9)                   |

Note, the level of significance was derived after adjustment for the design effect.

\*The difference is statistically significant ( $p < .05$ ) compared to the control group.

Table A5. Baseline characteristics for analysis of total vaccine protection at the onset of the first year of follow-up

| Variables                                                                                   | Vaccine group<br>(n=123,659) | Control group<br>(n=78,518) |
|---------------------------------------------------------------------------------------------|------------------------------|-----------------------------|
| Mean age at zero time (SD; years)                                                           | 23.2 (15.8)*                 | 24.6 (15.8)                 |
| Male participants (%)                                                                       | 56,196 (45.4)*               | 38,485 (49.0)               |
| Diarrhoea within previous 6 months at the time of household registration (%)                | 17,717 (14.3)                | 11,050 (14.1)               |
| Diarrhoea within previous 48 hours at the time of household registration (%)                | 1,652 (1.3)                  | 973 (1.2)                   |
| Mean time living in the area (SD; months)                                                   | 72.7 (118.5)                 | 74.3 (121.9)                |
| Lived in study area less than 1 year (%)                                                    | 51,903 (42.0)                | 31,725 (40.4)               |
| Live in their own house (%)                                                                 | 28,011 (22.7)                | 19,714 (25.1)               |
| Households using safe water source (household tap, %)                                       | 6,821 (5.5)                  | 4,157 (5.3)                 |
| Live in a household with specific place for waste disposal (%)                              | 101,172 (81.8)               | 60,744 (77.4)               |
| Live in a household with using sanitary (flushing) toilet (%)                               | 92,190 (74.6)                | 60,942 (77.6)               |
| Live in a household with a concrete roof (%)                                                | 107,465 (86.9)               | 66,249 (84.4)               |
| Live in a household with only one room (%)                                                  | 99,805 (80.7)                | 63,389 (80.7)               |
| Sharing kitchen with other households (%)                                                   | 108,766 (88.0)               | 65,258 (83.1)               |
| Live in a household sharing water source with others (%)                                    | 81,844 (66.2)                | 47,616 (60.6)               |
| Live in a household using treated water (boiled, filtered, or chemical treatment, %)        | 68,138 (55.1)                | 41,457 (52.8)               |
| Live in a household that knows about cholera vaccine (%)                                    | 5,873 (4.7)*                 | 6,306 (8.0)                 |
| Live in household close (less than the median distance) to the nearest icddr,b hospital (%) | 60,644 (49.0)                | 38,637 (49.2)               |
| Mean number of individuals per household (SD)                                               | 4.8 (1.9)                    | 4.8 (1.9)                   |
| Median distance to the nearest icddr,b hospitals (IQR; meters)                              | 1773 (1220, 2268)            | 1802 (991, 2414)            |
| Mean percentage of children younger than 5 years in the cluster (SD)                        | 10.0% (1.0)                  | 10.1% (1.0)                 |

| Variables                                                                                  | Vaccine group<br>(n=123,659) | Control group<br>(n=78,518) |
|--------------------------------------------------------------------------------------------|------------------------------|-----------------------------|
| Mean percentage of male participants in the cluster (SD)                                   | 48.5% (1.2)*                 | 49.0% (0.9)                 |
| Mean percentage of individuals using safe water source in the cluster (SD)                 | 5.2% (4.6)                   | 5.3% (3.6)                  |
| Mean percentage of individuals living in their own house in the cluster (SD)               | 21.2% (18.4)                 | 24.9% (24.7)                |
| Mean percentage of individuals using specific place for waste disposal in the cluster (SD) | 82.1% (23.4)                 | 77.4% (24.1)                |
| Mean percentage of individuals using sanitary (flushing) toilet in the cluster (SD)        | 74.8% (23.1)                 | 77.6% (21.5)                |

Note, the level of significance was derived after adjustment for the design effect.

\*The difference is statistically significant ( $p < .05$ ) compared to the control group.

Table A6. Baseline characteristics for analysis of total vaccine protection at the onset of the second year of follow-up

| Variables                                                                                   | Vaccine group<br>(n=73,373) | Control group<br>(n=50,443) |
|---------------------------------------------------------------------------------------------|-----------------------------|-----------------------------|
| Mean age at zero time (SD; years)                                                           | 23.9 (16.4)*                | 25.1 (16.3)                 |
| Male participants (%)                                                                       | 33,908 (46.2)*              | 25,016 (49.6)               |
| Diarrhoea within previous 6 months at the time of household registration (%)                | 10,675 (14.5)               | 7,038 (14.0)                |
| Diarrhoea within previous 48 hours at the time of household registration (%)                | 936 (1.3)                   | 586 (1.2)                   |
| Mean time living in the area (SD; months)                                                   | 99.7 (134.3)                | 96.5 (136.0)                |
| Lived in study area less than 1 year (%)                                                    | 22,296 (30.4)               | 15,707 (31.1)               |
| Live in their own house (%)                                                                 | 24,150 (32.9)               | 17,400 (34.5)               |
| Households using safe water source (household tap, %)                                       | 5,090 (6.9)                 | 3,335 (6.6)                 |
| Live in a household with specific place for waste disposal (%)                              | 59,765 (81.5)               | 38,598 (76.5)               |
| Live in a household with using sanitary (flushing) toilet (%)                               | 54,374 (74.1)               | 39,347 (78.0)               |
| Live in a household with a concrete roof (%)                                                | 63,738 (86.9)               | 42,396 (84.0)               |
| Live in a household with only one room (%)                                                  | 55,280 (75.3)               | 38,391 (76.1)               |
| Sharing kitchen with other households (%)                                                   | 61,740 (84.1)               | 39,767 (78.8)               |
| Live in a household sharing water source with others (%)                                    | 45,484 (62.0)               | 28,857 (57.2)               |
| Live in a household using treated water (boiled, filtered, or chemical treatment, %)        | 40,387 (55.0)               | 26,156 (51.9)               |
| Live in a household that knows about cholera vaccine (%)                                    | 3,131 (4.3)*                | 4,307 (8.5)                 |
| Live in household close (less than the median distance) to the nearest icddr,b hospital (%) | 36,459 (49.7)               | 24,539 (48.6)               |
| Mean number of individuals per household (SD)                                               | 5.0 (2.0)                   | 5.0 (2.0)                   |
| Median distance to the nearest icddr,b hospitals (IQR; meters)                              | 1766 (1264, 2248)           | 1812 (1221, 2400)           |
| Mean percentage of children younger than 5 years in the cluster (SD)                        | 10.0% (1.0)                 | 10.1% (1.0)                 |

| Variables                                                                                  | Vaccine group<br>(n=73,373) | Control group<br>(n=50,443) |
|--------------------------------------------------------------------------------------------|-----------------------------|-----------------------------|
| Mean percentage of male participants in the cluster (SD)                                   | 48.6% (1.2)*                | 49.1% (0.9)                 |
| Mean percentage of individuals using safe water source in the cluster (SD)                 | 5.6% (4.9)                  | 5.5% (3.6)                  |
| Mean percentage of individuals living in their own house in the cluster (SD)               | 23.2% (19.8)                | 28.1% (26.4)                |
| Mean percentage of individuals using specific place for waste disposal in the cluster (SD) | 82.0% (23.6)                | 76.6% (24.3)                |
| Mean percentage of individuals using sanitary (flushing) toilet in the cluster (SD)        | 74.7% (23.2)                | 77.5% (21.7)                |

Note, the level of significance was derived after adjustment for the design effect.

\*The difference is statistically significant ( $p < .05$ ) compared to the control group.

Table A7. Baseline characteristics for analysis of total vaccine protection at the onset of the third year of follow-up

| Variables                                                                                   | Vaccine group<br>(n=54,454) | Control group<br>(n=36,616) |
|---------------------------------------------------------------------------------------------|-----------------------------|-----------------------------|
| Mean age at zero time (SD; years)                                                           | 24.3 (16.7)*                | 25.5 (16.6)                 |
| Male participants (%)                                                                       | 25,460 (46.8)*              | 18,340 (50.1)               |
| Diarrhoea within previous 6 months at the time of household registration (%)                | 7,908 (14.5)                | 5,120 (14.0)                |
| Diarrhoea within previous 48 hours at the time of household registration (%)                | 697 (1.3)                   | 401 (1.1)                   |
| Mean time living in the area (SD; months)                                                   | 116.2 (142.3)               | 114.9 (145.2)               |
| Lived in study area less than 1 year (%)                                                    | 14,022 (25.8)               | 9,429 (25.8)                |
| Live in their own house (%)                                                                 | 21,389 (39.3)               | 15,569 (42.5)               |
| Households using safe water source (household tap, %)                                       | 4,208 (7.7)                 | 2,719 (7.4)                 |
| Live in a household with specific place for waste disposal (%)                              | 44,340 (81.4)               | 27,633 (75.5)               |
| Live in a household with using sanitary (flushing) toilet (%)                               | 40,143 (73.7)               | 28,100 (76.7)               |
| Live in a household with a concrete roof (%)                                                | 47,278 (86.8)               | 30,887 (84.4)               |
| Live in a household with only one room (%)                                                  | 39,495 (72.5)               | 26,744 (73.0)               |
| Sharing kitchen with other households (%)                                                   | 44,506 (81.7)               | 27,550 (75.2)               |
| Live in a household sharing water source with others (%)                                    | 32,163 (59.1)               | 19,518 (53.3)               |
| Live in a household using treated water (boiled, filtered, or chemical treatment, %)        | 29,571 (54.3)               | 18,214 (49.7)               |
| Live in a household that knows about cholera vaccine (%)                                    | 2,244 (4.1)*                | 2,869 (7.8)                 |
| Live in household close (less than the median distance) to the nearest icddr,b hospital (%) | 26,367 (48.4)               | 17,098 (46.7)               |
| Mean number of individuals per household (SD)                                               | 5.1 (2.0)                   | 5.1 (2.0)                   |
| Median distance to the nearest icddr,b hospitals (IQR; meters)                              | 1790 (1335, 2255)           | 1837 (1359, 2423)           |
| Mean percentage of children younger than 5 years in the cluster (SD)                        | 10.0% (1.0)                 | 10.1% (1.0)                 |



| Variables                                                                                  | Vaccine group<br>(n=54,454) | Control group<br>(n=36,616) |
|--------------------------------------------------------------------------------------------|-----------------------------|-----------------------------|
| Mean percentage of male participants in the cluster (SD)                                   | 48.6% (1.2)*                | 49.1% (0.9)                 |
| Mean percentage of individuals using safe water source in the cluster (SD)                 | 5.8% (5.0)                  | 5.6% (3.7)                  |
| Mean percentage of individuals living in their own house in the cluster (SD)               | 24.5% (20.4)                | 31.2% (27.5)                |
| Mean percentage of individuals using specific place for waste disposal in the cluster (SD) | 81.9% (23.7)                | 76.0% (24.5)                |
| Mean percentage of individuals using sanitary (flushing) toilet in the cluster (SD)        | 74.7% (23.5)                | 76.6% (22.5)                |

Note, the level of significance was derived after adjustment for the design effect.

\*The difference is statistically significant ( $p < .05$ ) compared to the control group.

Table A8. Baseline characteristics for analysis of total vaccine protection at the onset of the fourth year of follow-up

| Variables                                                                                   | Vaccine group<br>(n=42,675) | Control group<br>(n=28,734) |
|---------------------------------------------------------------------------------------------|-----------------------------|-----------------------------|
| Mean age at zero time (SD; years)                                                           | 24.5 (16.9)*                | 25.7 (16.8)                 |
| Male participants (%)                                                                       | 20,131 (47.2)*              | 14,537 (50.6)               |
| Diarrhoea within previous 6 months at the time of household registration (%)                | 6,209 (14.5)                | 3,978 (13.8)                |
| Diarrhoea within previous 48 hours at the time of household registration (%)                | 537 (1.3)                   | 296 (1.0)                   |
| Mean time living in the area (SD; months)                                                   | 128.9 (146.9)               | 129.0 (150.6)               |
| Lived in study area less than 1 year (%)                                                    | 9,653 (22.6)                | 6,375 (22.2)                |
| Live in their own house (%)                                                                 | 19,149 (44.9)               | 14,000 (48.7)               |
| Households using safe water source (household tap, %)                                       | 3,630 (8.5)                 | 2,262 (7.9)                 |
| Live in a household with specific place for waste disposal (%)                              | 34,595 (81.1)               | 21,472 (74.7)               |
| Live in a household with using sanitary (flushing) toilet (%)                               | 31,330 (73.4)               | 21,847 (76.0)               |
| Live in a household with a concrete roof (%)                                                | 37,039 (86.8)               | 24,452 (85.1)               |
| Live in a household with only one room (%)                                                  | 29,993 (70.3)               | 20,401 (71.0)               |
| Sharing kitchen with other households (%)                                                   | 33,882 (79.4)               | 20,786 (72.3)               |
| Live in a household sharing water source with others (%)                                    | 24,082 (56.4)               | 14,502 (50.5)               |
| Live in a household using treated water (boiled, filtered, or chemical treatment, %)        | 22,695 (53.2)               | 13,618 (47.4)               |
| Live in a household that knows about cholera vaccine (%)                                    | 1,676 (3.9)*                | 2,128 (7.4)                 |
| Live in household close (less than the median distance) to the nearest icddr,b hospital (%) | 20,308 (47.6)               | 13,382 (46.6)               |
| Mean number of individuals per household (SD)                                               | 5.1 (2.0)                   | 5.1 (2.0)                   |
| Median distance to the nearest icddr,b hospitals (IQR; meters)                              | 1819 (1397, 2260)           | 1837 (1372, 2446)           |
| Mean percentage of children younger than 5 years in the cluster (SD)                        | 9.9% (1.0)                  | 10.1% (1.0)                 |

| Variables                                                                                  | Vaccine group<br>(n=42,675) | Control group<br>(n=28,734) |
|--------------------------------------------------------------------------------------------|-----------------------------|-----------------------------|
| Mean percentage of male participants in the cluster (SD)                                   | 48.7% (1.2)*                | 49.2% (0.9)                 |
| Mean percentage of individuals using safe water source in the cluster (SD)                 | 6.0% (5.2)                  | 5.7% (3.7)                  |
| Mean percentage of individuals living in their own house in the cluster (SD)               | 26.0% (20.9)                | 33.6% (28.2)                |
| Mean percentage of individuals using specific place for waste disposal in the cluster (SD) | 81.7% (23.8)                | 75.5% (24.6)                |
| Mean percentage of individuals using sanitary (flushing) toilet in the cluster (SD)        | 74.7% (23.6)                | 76.3% (22.9)                |

Note, the level of significance was derived after adjustment for the design effect.

\*The difference is statistically significant ( $p < .05$ ) compared to the control group.
